# Supplementary material
Source: publisher figshare collection journal article supplement (https://acs.figshare.com/ndownloader/files/22778654)
Supplement: Supplementary file 1 [file 22778654]

# U-Shaped Mobility Analyzer (UMA): A Compact and High-Resolution Counter-Flow Ion Mobility Spectrometer.

## SUPPORTING INFORMATION

Keke Wang<sup>1</sup>, Ran Qiu<sup>1</sup>, Xiaoqiang Zhang<sup>1</sup>, Kent J. Gillig<sup>2</sup>, and Wenjian Sun<sup>1\*</sup>

<sup>1</sup> Shimadzu Research Laboratory (Shanghai) Co. Ltd, Shanghai 201206, People's Republic of China

<sup>2</sup> Genomics Research Center, Academia Sinica, Taipei, Taiwan

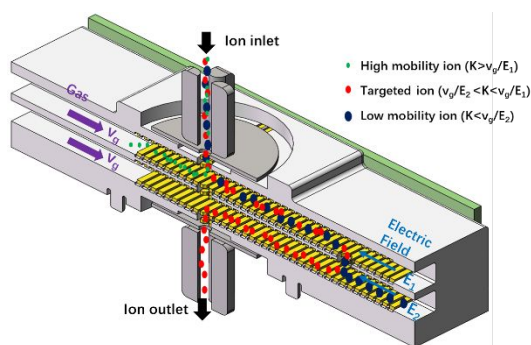

Corresponding Author

\* Dr. Wenjian Sun, E-mail: [sunwenjian@srlab.com.cn](mailto:sunwenjian@srlab.com.cn)

## Theoretical calculation of ion mobility resolving power in UMA

**Table S-1. Parameter and Definition**

| Symbols | Definition                                                               |
|---------|--------------------------------------------------------------------------|
| $K$     | Ion mobility                                                             |
| $E$     | Electric field                                                           |
| $E_1$   | Electric field in the Channel 1 (CH1)                                    |
| $E_2$   | Electric field in the Channel 2 (CH2)                                    |
| $dE$    | Electric field difference between CH1 and CH2                            |
| $\beta$ | Scan rate                                                                |
| $m$     | Ion mass                                                                 |
| $q$     | Ion charge number                                                        |
| $k_B$   | Boltzmann's constant                                                     |
| $T$     | Temperature                                                              |
| $D$     | Diffusion coefficient                                                    |
| $v_g$   | Gas velocity                                                             |
| $L_2$   | Length of CH2                                                            |
| $L_t$   | Length of trap region (in trap-scan mode)                                |
| $L_P$   | Length of plateau (in trap-scan mode)                                    |
| $R_f$   | Ion mobility resolving power in filter-scan mode defined by $t/\Delta t$ |

|           |                                                                          |
|-----------|--------------------------------------------------------------------------|
| $R_{f,K}$ | Ion mobility resolving power in filter-scan mode defined by $K/\Delta K$ |
| $R_t$     | Ion mobility resolving power in trap-scan mode defined by $t/\Delta t$   |
| $R_{t,K}$ | Ion mobility resolving power in trap-scan mode defined by $K/\Delta K$   |

### S1. Resolving power in filter-scan mode

In filter-scan mode, electric field difference between two channels is kept a constant.

Scan rate of  $E_1$  and  $E_2$  is  $\beta$ , and  $E_1$  is started to scan from 0.

$$E_2 - E_1 = dE = \text{const} \quad (1)$$

Ion mobility resolving power in a time-intensity spectrum can be calculated as:

$$R_f = \frac{t_1 + t_2}{\Delta t}, \quad (2)$$

in which  $t_1$  is not the ion drift time in CH1, but it is the scan time before  $E_1 = v_g/K$ ;  $t_2$  is the ion drift time in CH2;  $\Delta t$  is the ion peak spread (FWHM) in spectrum.

For  $t_1$ , we have:

$$t_1 = \frac{v_g}{K\beta} \quad (3)$$

For  $t_2$ , we have:  $v_2 = E_2 K - v_g = \left(\frac{v_g}{K} + \beta t\right) K - v_g = K\beta * t$ , so that ion drift in CH2 with a constant acceleration velocity, we can calculate  $t_2$  as:

$$t_2 = \sqrt{\frac{2L_2}{K\beta}} \quad (4)$$

For  $\Delta t$ , we have:

$$\Delta t = \sqrt{t_g^2 + t_d^2}, \quad (5)$$

in which  $t_g$  is the time window when  $E$  is scanned in the window of  $dE$ ,  $t_d$  is the diffusion spread of ions in CH2. And we have:

$$t_g = \frac{dE}{\beta} \quad (6)$$

$$t_d = \sqrt{16 \ln 2 \cdot D \cdot t_2} / v_2, \quad (7)$$

in which  $D = \frac{K \cdot k_B T}{q}$  [1], and  $v_2$  is the ion velocity at the end of CH2, and we have:

$$v_2 = K\beta \cdot t_2 \quad (8)$$

From Equation (2) to (8), we obtain the resolving power as:

$$R_f = \frac{\frac{v_g}{K\beta} + \sqrt{\frac{2L_2}{K\beta}}}{\sqrt{\frac{dE^2}{\beta^2} + \frac{16 \ln 2 \cdot k_B T}{q} \frac{1}{\beta^{3/2} \sqrt{2L_2 K}}}}} = \frac{v_g + \sqrt{2L_2 K \beta}}{\sqrt{dE^2 K^2 + \frac{16 \ln 2 \cdot k_B T}{q} \sqrt{\frac{\beta}{2L_2 K^{3/2}}}}} \quad (9)$$

Normally,  $t_1$  is tens to hundreds of milliseconds, while  $t_2$  is a few milliseconds. In the case of  $t_1 \gg t_2$ , we have:

$$R_f \approx \frac{\frac{v_g}{K\beta}}{\sqrt{\frac{dE^2}{\beta^2} + \frac{16 \ln 2 \cdot k_B T}{q} \frac{1}{\beta^{3/2} \sqrt{2L_2 K}}}}} = \frac{v_g}{\sqrt{dE^2 K^2 + \frac{16 \ln 2 \cdot k_B T}{q} K^2 \sqrt{\frac{\beta}{2L_2}}}} \quad (10)$$

In this equation, the term of “ $dE^2$ ” can be viewed as the effect of ion gate width, if analogous to a traditional ion mobility drift cell.

On the other hand, if mobility resolving power is defined by  $K/\Delta K$ , where  $\Delta K$  is the peak width (FWHM) in a mobility-intensity spectrum, we have:

$$R_{f,K} = \frac{K}{\Delta K} = \frac{K \cdot \frac{dt}{dK}}{\Delta t} = \frac{-\frac{v_g}{K\beta} + \sqrt{\frac{L_2}{2K\beta}}}{\sqrt{\frac{dE^2}{\beta^2} + \frac{16 \ln 2 \cdot k_B T}{q} \frac{1}{\beta^{3/2} \sqrt{2L_2 K}}}}} \quad (11)$$

$R_{f,K}$  is slightly lower than  $R_f$ . With a normal scan rate,  $R_{f,K}$  is approximately the same as  $R_f$ .

## S2. Resolving power in trap-scan mode

In this case, ion motion in a gas flow with an opposed electric field can be described by the Nernst-Planck equation

$$\frac{\partial n}{\partial t} - \nabla \cdot (\bar{D} \cdot \nabla n - (\vec{v}_g - K\vec{E})n) = 0, \quad (12)$$

in which  $n(r,x,t)$  is the ion concentration,  $\bar{D}$  is the isotropic diffusion tensor. If we only considering a simple 1D model in  $x$  direction and neglecting the radial electric field and diffusion, the Nernst-Planck equation will be

$$\frac{\partial n(x,t)}{\partial t} - \frac{\partial}{\partial x} \left( D \cdot \frac{\partial}{\partial x} n(x,t) - (v_g - KE(x,t)) \cdot n(x,t) \right) = 0 \quad (13)$$

In UMA trap-scan mode, CH1 is for the ion accumulation (Figure 4a in the paper). The beginning of CH2 is as the receptor of those accumulated ions and also as the temporal trapping region (Figure 4b), and this region can be called as the “trap region”. The other part of CH2 is for ion elution and for mobility separation, and it is so-called “plateau”.

The ion elution time  $t_e$  after the “trap region” but before the “plateau”, with a scan rate  $\beta$ , can be determined by the timing for ions being upon the same electric force and the drag force:

$$t_e = \frac{v_g/K}{\beta} \quad (14)$$

Those eluted ions will drift in the “plateau” for a relatively long time. Ion motion in the plateau of CH2 is similar to that in filter-scan mode, which has a constant acceleration  $K\beta$ , so that the ion drift time in the plateau of CH2  $t_p$  is:

$$t_p = \sqrt{\frac{2L_p}{K\beta}} \quad (15)$$

The ion motion in the “trap region” has been dealt with in several papers by solving the equation (14), in which the electric field is linearly increased in space [2, 3, 4]. Here we will directly use the result in [2] for the ion spatial spread after the “trap region” but before the “plateau”:

$$\Delta x_t = \sqrt{\frac{8 \ln 2 k_B T}{q} \cdot \frac{KL_t}{v_g}} \quad (16)$$

The next step is to calculate the ion spatial spread after the “plateau”. For an ion packet

which has a very small narrow distribution, such as the case after UMA “trap region”, the ion spatial width can be easily solved from the diffusion equation,

$$\Delta x_p = \sqrt{\Delta x_t^2 + 16 \ln 2 t_p} \quad (17)$$

Ion drift speed at the end of “plateau” is also similar to that in filter-scan mode  $v_p = K\beta$  \*  $t_p$ . Hence the temporal ion distribution can be obtained:

$$\Delta t = \frac{\Delta x_p}{K\beta t_p} \quad (18)$$

If the resolving power in trap-scan mode is also defined as  $t/\Delta t$ , then it can be calculated according to equation (14) to (18)

$$R_t = \frac{\frac{v_g}{\sqrt{K\beta}} \sqrt{2L_p} + 2L_p}{\sqrt{\frac{8 \ln 2 k_B T}{q} \cdot \frac{K L_t}{v_g} + 16 \ln 2 \sqrt{\frac{2L_p}{K\beta}}} \quad (19)$$

In UMA, the length of “trap region” is only 4mm, which is much less than that of “plateau” 36mm, so that approximately we can let  $L_t \approx 0$ ,  $L_p \approx L_2$ . On the other side, in a normal scan rate,  $t_e \ll t_p$ , so that the resolution  $R_{t,K}$  which is defined by  $K/\Delta K$  is approximately the same as the resolution  $R_t$  which is defined by  $t/\Delta t$ . The equation for mobility resolving power can be simply deduced as:

$$R_t \approx R_{t,K} = \frac{v_g}{\sqrt{\frac{16 \ln 2 \cdot k_B T}{q} K^{3/2} \sqrt{\frac{\beta}{2L_2}}}} \quad (20)$$

In order to compare the equation to that for the filter-scan mode, we can isolate the initial ion spread in space in the “trap region”  $\Delta x_t$ , the resolving power will be obtained as:

$$R_t \approx \frac{v_g}{\sqrt{\frac{\Delta x_t^2}{2L_2 K\beta} + \frac{16 \ln 2 \cdot k_B T}{q} K^{3/2} \sqrt{\frac{\beta}{2L_2}}}} \quad (21)$$

Compare the Equation (21) to (10), there is no “ion gate width” in trap-scan mode, while there is no “ion initial space spread” in filter-scan mode. In a normal analysis, the effect of “ion initial space spread” is much less than that of space spread in plateau [2].

The latter is usually less than the effect of “ion gate width” to degradation of resolving power.

Therefore, the absolute value of  $R_f$  is usually lower than  $R_t$ . For example, if  $v_g=150$  m/s,  $L_2=4$  cm,  $\beta=30$  V/mm/s and the electric field is started to scan from 0,  $T=300$  K, ion mobility  $K=250$  cm<sup>2</sup>/V/s,  $\Delta E=0.01$  V/mm in filter-scan mode and  $\Delta x_t=1$  mm in trap-scan mode, then the calculated  $R_f=181.3$ , and  $R_t=188.0$ .

## REFERENCES

1. Siems WF, Wu C, Tarver EE, Hill HH, Larsen PR, McMinn DG. Anal. Chem. 1994, 66, 4195.
2. Michelmann K, Silveira JA, Ridgeway ME, Park MA, J. Am. Soc. Mass Spectrom. (2015) 26:14-24
3. Nahin M, Oberreit D, Fukushima N, Larriba-Andaluz C, Sci. Rep. 2017, 7, DOI: 10.1038/s41598-017-06448-w.
4. Larriba-Andaluz C, Chen X, Nahin M, Wu T, Fukushima N, Anal. Chem. 2019, 91(1): 919-927.
